# Systematic genetic dissection of chitin degradation and uptake in *Vibrio cholerae*

Chelsea A. Hayes, Triana N. Dalia, and Ankur B. Dalia\*

Department of Biology, Indiana University, Bloomington, Indiana, USA

\*Author for correspondence: Ankur B. Dalia, email: [ankdalia@indiana.edu](mailto:ankdalia@indiana.edu), Tel: (812) 856-1895; Fax: (812) 855-6705.

Running Title: Genetic dissection of chitinases in *V. cholerae*

## SUMMARY

*Vibrio cholerae* is a natural resident of the aquatic environment, where a common nutrient is the chitinous exoskeletons of microscopic crustaceans. Chitin utilization requires chitinases, which degrade this insoluble polymer into soluble chitin oligosaccharides. These oligosaccharides also serve as an inducing cue for natural transformation in *Vibrio* species. There are 7 predicted chitinase-like genes in the *V. cholerae* genome. Here, we systematically dissect the contribution of each gene to growth on chitin as well as induction of natural transformation. Specifically, we created a strain that lacks all 7 putative chitinases and from this strain, generated a panel of strains where each expresses a single chitinase. We also generated expression plasmids to ectopically express all 7 chitinases in our chitinase deficient strain. Through this analysis, we found that low levels of chitinase activity are sufficient for natural transformation, while growth on insoluble chitin as a sole carbon source requires more robust and concerted chitinase activity. We also assessed the role that the three uptake systems for the chitin degradation products GlcNAc, (GlcNAc)<sub>2</sub>, and (GlcN)<sub>2</sub>, play in chitin utilization and competence induction. Cumulatively, this study provides mechanistic details for how this pathogen utilizes chitin to thrive and evolve in its environmental reservoir.

## INTRODUCTION

The cholera pathogen, *Vibrio cholerae*, is a natural resident of the aquatic environment. In this niche, this bacterium forms biofilms on the chitinous shells of crustacean zooplankton. These chitin biofilms are important for the water-borne transmission of cholera (Colwell et al., 2003). Also, chitin, an insoluble polymer of  $\beta$ 1,4-linked N-acetylglucosamine (GlcNAc), serves as an important carbon and nitrogen source for *V. cholerae* in the environment (Huq et al., 1983). To utilize this carbon source, this pathogen must degrade chitin into soluble oligosaccharides via the action of chitinases. Subsequently, these chitin oligosaccharides are transported across the outer membrane and into the periplasm via a chitoporin and further broken down into mono- and di-saccharides, which can be transported across the inner membrane by specific transporters (Meibom et al., 2004; Hunt et al., 2008).

Chitin oligosaccharides also induce the genes required for natural transformation in *V. cholerae*, a physiological state in which cells can take up exogenous DNA and integrate it into their chromosome by homologous recombination (Meibom et al., 2005). Therefore, the interaction of *V. cholerae* with chitin is important for the survival and evolution of this pathogen in its environmental reservoir as well as transmission to its human host. The chitin utilization genes of *V. cholerae* have been identified by homology as well as by identifying genes induced in the presence of chitin oligosaccharides (Meibom et al., 2004; Hunt et al., 2008). For degradation, *V. cholerae* encodes 7 putative chitinase genes. These are ChiA1 (VC1952), ChiA2 (VCA0027), VC0769, VCA0700, VC1073, VCA0140, and GbpA (VCA0811). ChiA1 and ChiA2 have previously been implicated as the major chitinases required for chitin degradation (Meibom et al., 2004; Watve et al., 2015; Dalia, 2016). VC0769 and VC1073 are predicted chitinases, however, their role in chitin degradation in *V. cholerae* has not formally been tested. VCA0700 is a predicted periplasmic chitodextrinase, which further degrades soluble chitin oligosaccharides (Keyhani and Roseman, 1996b). VCA0140 encodes a predicted spindolin-related protein, however, this gene also contains a predicted chitin-binding domain and was therefore included as a putative chitinase. Finally, GbpA is a GlcNAc binding protein, however, it is also predicted to contain lytic polysaccharide monooxygenase activity (Loose et al., 2014). Chitinases have been shown to function cooperatively in other chitinolytic organisms to promote chitin degradation (Suzuki et al., 2002). However, a systematic analysis of chitinases has not been

performed in *V. cholerae* to assess the possibility of synergy among these enzymes or the relative contribution of each to chitin-dependent growth and induction of natural transformation.

Here, we systematically dissect the genes required for chitin degradation and uptake via multiplex genome editing by natural transformation (MuGENT) (Dalia et al., 2014b). This analysis has uncovered the chitinases that are necessary and sufficient for both chitin utilization and chitin-induced natural transformation in *V. cholerae*.

## RESULTS

### *Single mutants reveal that ChiA2 is critical for growth on chitin and chitin-induced natural transformation*

First, we assessed the role of each putative chitinase during growth on chitin as a sole carbon source and chitin-induced natural transformation in single mutant strains. We find that ChiA2 is important for both growth on chitin and chitin-induced natural transformation (**Fig. 1A and 1B**). This is consistent with recent reports on the importance of ChiA2 for chitin-induced natural transformation (Mondal and Chatterjee, 2016). WT levels of growth on chitin also required the periplasmic chitodextrinase VCA0700 (**Fig. 1A**), however, this gene was dispensable for chitin-induced natural transformation (**Fig. 1B**). Interestingly, while chitin-induced natural transformation was reduced in mutants lacking ChiA2, it was not as deficient as a mutant lacking *pilA*, which fails to make the pilus required for uptake of exogenous DNA (Seitz and Blokesch, 2013). Since soluble chitin oligosaccharides generated by chitinases are required to induce natural competence (Meibom et al., 2005), these data suggest that other chitinases may be able to support a low level of chitin-induced natural transformation in the absence of ChiA2.

### *MuGENT for systematic genetic dissection of chitinases*

While our data above highlighted that ChiA2 is important for chitin degradation, we still observed chitin-dependent natural transformation in the absence of this enzyme. To determine if other chitinases function cooperatively and/or in the absence of ChiA2, we decided to generate a strain where all 7 chitinase-like genes were inactivated. To

accomplish this, we used a method we previously developed called MuGENT. This method allows for making multiple scarless mutations simultaneously in a single step (Dalia et al., 2014b; Hayes et al., 2017). The 7 chitinase-like genes are spread throughout both chromosomes (**Fig. 2A**), and were targeted for inactivation by generating out-of-frame ~500bp deletions in the 5' end of each gene. Using this approach, we rapidly generated a strain lacking all 7 putative chitinases, which we refer to as  $\Delta 7$  henceforth (**Fig. 2B**). We then created a panel of strains where each expresses only a single chitinase (i.e. are  $\Delta 6$ ) by systematically reverting one putative chitinase gene in each strain (**Fig. 2B**).

# *MuGENT of chitinases reveals that ChiA2 is sufficient for chitin-induced natural transformation but not growth on chitin as a sole carbon source*

First, we assessed our  $\Delta 7$  strain for growth on chitin and chitin-induced natural transformation. As expected, we found that this strain grew poorly on chitin (**Fig. 3A**). Also, we find that the  $\Delta 7$  strain is significantly reduced for chitin-induced natural transformation (at the limit of detection) compared to a ChiA2 single mutant or a ChiA1 ChiA2 double mutant (**Fig. 1B and 3B**). This is consistent with the other chitinases playing a minor role in promoting chitin-induced natural transformation in the absence of ChiA2. Chitin induction for natural transformation can be bypassed by overexpression of TfoX, the master regulator of competence (Meibom et al., 2005). To confirm that natural transformation was only attenuated in our  $\Delta 7$  strain as a result of reduced chitinase activity, we ectopically expressed TfoX in this mutant and tested natural transformation in a chitin-independent assay. Under these conditions, as expected, we found that the  $\Delta 7$  strain was as transformable as the WT (**Fig. 3C**). Also, we would predict that the  $\Delta 7$  strain would still be capable of growing on chitin degradation products. Consistent with this, we find that this strain grows as well as the wildtype on chitobiose and the chitin monomer GlcNAc (**Fig. S1**).

Next, we tested our panel of  $\Delta 6$  mutants (each expressing a single chitinase) to determine if any chitinase was sufficient for growth on chitin and chitin-induced natural transformation. While no chitinase could independently support growth on chitin, the strain with just ChiA2 could support chitin-induced natural transformation at near WT levels (**Fig. 3A and**

**3B).** While ChiA2 could restore chitin-induced natural transformation, none of the other chitinases could promote this activity. These results indicate that growth on chitin and chitin-induced natural transformation are separable phenomena since a strain only expressing ChiA2 supported high levels of natural transformation but did not grow on chitin as a sole carbon source. Thus, ChiA2 is both necessary and sufficient for chitin-induced natural transformation.

One reason why ChiA2 may be the most important chitinase in *V. cholerae* is if this gene is simply the most highly expressed chitinase under the conditions tested. Previous work has uncovered the most highly upregulated chitinases through microarray analysis (Meibom et al., 2004), however, these studies do not provide insight into the relative expression level of each of the seven predicted chitinases. To assess this, we performed RNA-seq on wildtype bacteria grown in the presence or absence of chitin hexasaccharide (GlcNAc)<sub>6</sub> to induce the expression of chitin-regulated genes. As in prior studies (Meibom et al., 2004), lactate was provided in both conditions as a chitin-independent carbon source. Indeed, we find that ChiA2 is the most highly expressed chitinase under these conditions (**Fig. 4A**).

Thus, a trivial explanation for the relative importance of ChiA2 in *V. cholerae* might be that this chitinase is the only one expressed at the levels required for efficient liberation of chitin oligosaccharides. To test this further, we bypassed the native regulation of these chitinases by ectopically expressing each in pMMB67EH (abbreviated pMMB), an IPTG-inducible *P<sub>tac</sub>* expression vector that supports high levels of gene expression (Furste et al., 1986). As expected, ectopic expression of ChiA2 restored wildtype levels of growth on chitin to a ChiA2 single mutant (**Fig. 4B**). Ectopic expression of ChiA1, VC0769, and VCA0700 also restored growth on chitin to a ChiA2 single mutant; however, this was not to wildtype levels (**Fig. 4B**). Thus, this result suggests that ChiA2 expression levels alone cannot fully account for the importance of this chitinase during growth on chitin and chitin-induced natural transformation.

Next, we ectopically expressed each chitinase in our  $\Delta 7$  mutant. This analysis uncovered that none of these chitinases, even when overexpressed, could independently support

growth on chitin (**Fig. 4C**). However, five of these genes (*chiA1*, *chiA2*, VC0769, VCA0700, and VC1073), did enhance chitin-induced natural transformation when overexpressed (**Fig. 4D**). Together, these results suggest that low levels of chitinase activity may be sufficient to promote chitin-induced natural transformation, while robust (and possible concerted chitinase activity) is required for efficient chitin utilization. Furthermore, since chitin-induced natural transformation requires soluble chitin oligosaccharides, this analysis suggests that VC0769, VCA0700, and VC1073 possess *bona fide* chitinase activity (**Fig. 4D**), however, since they could not recover wildtype levels of growth on chitin to a *chiA2* single mutant (**Fig. 4B**), this suggests that they may have substantially lower chitinase activity than ChiA2. Conversely, VCA0140 and GbpA did not promote chitin-induced natural transformation even when overexpressed in the  $\Delta 7$  background, suggesting that these genes cannot independently liberate soluble chitin oligosaccharides (**Fig. 4D**).

To confirm that chitinases were expressed to similar levels in our pMMB constructs, we generated variants of each expression vector where each chitinase had a C-terminal FLAG tag. These FLAG-tagged constructs were functional as determined by their ability to induce natural transformation in the  $\Delta 7$  mutant (**Fig. S2**), and western blot analysis revealed that all 7 chitinases were secreted at similar levels when overexpressed (**Fig. 4E**). To confirm that protein in the supernatant in this experiment was the result of secretion and not cell lysis we detected the RNA polymerase alpha subunit (RpoA), which as expected, was found only in the cell pellet fraction. Thus, these results indicate that phenotypic differences observed among the distinct chitinases likely reflects differences in activity and not differences in expression / secretion.

#### *ChiA2 works in conjunction with the periplasmic chitodextrinase VCA0700 to promote growth on chitin as a sole carbon source*

Since ChiA2 was not independently sufficient to promote growth on chitin as a sole carbon source, we hypothesized that it may work in conjunction with another chitinase to promote robust chitin degradation and utilization. We hypothesized that the chitodextrinase VCA0700 would be a likely candidate for two reasons. One, when characterizing the phenotypes of single mutants, we found that loss of VCA0700 resulted in reduced growth

on chitin. Second, VCA0700 is predicted to be found at a distinct subcellular localization and we hypothesized that the concerted action of the extracellular chitinase ChiA2 and the predicted periplasmic chitodextrinase VCA0700 might be required for efficient chitin utilization. To test this, we took the  $\Delta 6$  strain that only expressed VCA0700 and systematically knocked back in each of the other 6 chitinases to generate a panel of  $\Delta 5$  strains where each is expressing 2 chitinases (one being VCA0700). When testing this panel for growth on chitin, we find that the strain that contains VCA0700 and ChiA2 is capable of wildtype levels of growth on chitin (**Fig. 5A**). Also, this strain displays wildtype levels of chitin-induced natural transformation (**Fig. 5B**). To determine if VCA0700 could work in conjunction with any of the other chitinases to mediate growth on chitin, we ectopically expressed each chitinase in the  $\Delta 6$  strain that only encodes VCA0700. We found that only ChiA2 could promote robust growth in this background (**Fig. 5C**). Cumulatively, these results indicate that ChiA2 and VCA0700 work together to efficiently degrade insoluble chitin in *V. cholerae*.

# *Dissecting the role of chitin transporters during growth on chitin and chitin-induced natural transformation*

Once liberated from insoluble chitin via chitinase activity, chitin oligosaccharides are subsequently transported into the periplasm through the action of a chitoporin (encoded by VC0972) (Keyhani et al., 2000; Meibom et al., 2004). These oligosaccharides must then be degraded into mono- or di-saccharides that can be transported across the inner membrane. These are the monosaccharide GlcNAc and the disaccharides (GlcNAc)<sub>2</sub> (i.e. chitobiose) and (GlcN)<sub>2</sub> (i.e. the unacetylated chitin disaccharide). GlcNAc and (GlcN)<sub>2</sub> are transported via the action of two distinct PEP-dependent phosphotransferase system transporters (VC0995 and VC1282, respectively), while (GlcNAc)<sub>2</sub> is transported via an ABC transporter (permease encoded by VC0618 and VC0619) (Meibom et al., 2004; Hunt et al., 2008). To assess the role of each of these transporters during growth on chitin and chitin-induced natural transformation, we generated a panel of mutants lacking all possible combinations of the three inner membrane transporters. We also generated a strain lacking the outer membrane chitoporin. For growth on chitin, we find that the chitoporin VC0972 is required for wildtype levels of growth, which is consistent with previous reports (**Fig.**



6A) (Meibom et al., 2004). Also, while any one inner membrane transporter is dispensable, loss of both the GlcNAc and (GlcNAc)<sub>2</sub> transporters resulted in lack of growth on chitin (**Fig. 6A**). Thus, this suggests that chitin is efficiently broken down to GlcNAc and (GlcNAc)<sub>2</sub>, while formation of (GlcN)<sub>2</sub> is less efficient. Indeed, in some sources of chitin, there is only 1 GlcN residue for every 6 GlcNAc residues (Meibom et al., 2004). While *V. cholerae* does encode a putative chitin deacetylase (VC1280) adjacent to the locus required for (GlcN)<sub>2</sub> uptake, the activity or expression of this enzyme must not support robust growth on chitin as a sole carbon source (Meibom et al., 2004; Hunt et al., 2008). Among this panel of mutants, reduced growth on chitin as a sole carbon source directly correlated with reduced rates of chitin-induced natural transformation (**Fig. 6A and 6B**), which suggests that reduced rates of transformation among transporter mutants may largely be due to an inability to grow under competence-inducing conditions.

## DISCUSSION

These results suggest that ChiA2 and VCA0700 work synergistically to promote efficient degradation of chitin in *V. cholerae* for both growth on this carbon source and induction of natural transformation (**Fig. 7**). ChiA2 likely works extracellularly to generate chitin oligosaccharides, while the chitodextrinase VCA0700 may work in the periplasm to degrade these oligosaccharides further for uptake through the inner membrane. ChiA2 is the most important extracellular chitinase under the conditions used here, since this enzyme is necessary for growth on chitin as a sole carbon source and for chitin-induced natural transformation. Based on expression levels, ChiA2 is the most highly expressed chitinase in *V. cholerae*. Ectopic overexpression of other chitinases, however, did not complement a ChiA2 mutant, which suggests that the activity (and not just expression level) of ChiA2 may be important for the chitinolytic activity of *V. cholerae* under the conditions tested. The importance of VCA0700 for growth on chitin is consistent with previous reports, which suggested that the periplasmic steps of chitin degradation are limiting for chitin utilization (Bassler et al., 1991). Loss of VCA0700 alone, however, did not result in complete loss of growth on chitin. This suggests that in the VCA0700 mutant, the other chitinases may work together to cleave chitin into products that can be taken up without the need for chitodextrinase activity, albeit less efficiently.



There are a number of reasons why degradation of chitin in two stages, one extracellular and one periplasmic, may be beneficial to the organism. One, relatively few microorganisms can take up long chitin oligosaccharides from the extracellular environment, while many microbes can take up chitin-derived mono- and di-saccharides. *Vibrio* species encode a specific chitoporin (VC0972 in *V. cholerae*) to transport oligosaccharides across the outer membrane, which could provide a competitive advantage in the environment (Suginta et al., 2013). A second benefit to this spatially segregated degradation is that chitin oligosaccharides serve as an important cue in the periplasm to signal upregulation of the chitin utilization regulon (Keyhani and Roseman, 1996a; Li and Roseman, 2004) and genes required for natural competence (Meibom et al., 2004; Dalia et al., 2014a). Thus, it is beneficial to take up long chain oligosaccharides into the periplasm to serve as an inducing cue prior to degradation for uptake and catabolism. Surprisingly, our analysis of VCA0700 indicated that when this chitodextrinase is ectopically expressed, some of this protein may be secreted to the extracellular milieu and this is not a consequence of cell lysis (**Fig. 4E**). Indeed, our results also indicate that VCA0700 can act extracellularly since overexpression of this chitinase supported chitin-induced natural transformation in our  $\Delta 7$  strain. Thus, the concentrated action of ChiA2 and VCA0700 may be spatially segregated (extracellular ChiA2 and periplasmic VCA0700) as previously hypothesized or it is possible that both of these chitinases function extracellularly to efficiently degrade insoluble chitin into soluble oligosaccharides. Further analysis of ChiA2 and VCA0700 localization and activity will shed light on this question, which will be the focus of future work.

Induction of chitin-induced natural transformation requires ChiA2, while periplasmic degradation via the chitobextrinase VCA0700 was largely dispensable. It was previously shown that VCA0700 lacks detectable activity on insoluble chitin; however, it has robust activity on soluble long chain chitin oligosaccharides (Keyhani and Roseman, 1996b). Our previous work has shown that longer chains of chitin oligosaccharides are optimal at inducing the activity of the chitin sensor TfoS, which is required for competence induction (Dalia et al., 2014a). Thus, VCA0700 activity may not be required for competence induction

1 since this enzyme largely acts to reduce oligosaccharide chain length while playing a  
2 limited role in liberating long chitin oligosaccharides from insoluble chitin.

3  
4  
5 Mutational analysis of the chitin transporters revealed that the outer membrane chitoporin  
6 was important for growth on chitin as a sole carbon source and for competence induction.  
7 The inner membrane GlcNAc and (GlcNAc)<sub>2</sub> transporters on the other hand were  
8 genetically redundant for these activities (**Fig. 7**). Loss of chitin-induced natural  
9 transformation in transporter mutants directly correlated with the reduced ability of these  
10 strains to grow on chitin as a sole carbon source. A strain that only expresses the chitinase  
11 ChiA2 (i.e. a  $\Delta 6$  strain), however, is not able to grow on chitin, while it displays high rates of  
12 natural transformation. Also, overexpression of 5 of the 7 predicted chitinases in the  $\Delta 7$   
13 strain supported natural transformation while none supported growth on chitin as a sole  
14 carbon source. This suggests that induction of competence only requires relatively low  
15 levels of chitinase activity and by extension only small amounts of chitin oligosaccharides,  
16 while growth on chitin may require more robust and concerted chitinase activity. As  
17 mentioned above, TfoS, the membrane-embedded chitin sensor required for natural  
18 transformation, is induced by long chain chitin oligosaccharides (Dalia et al., 2014a). Thus,  
19 loss of the chitoporin, which specifically imports long chain chitin oligosaccharides into the  
20 periplasm (Suginta et al., 2013), may result in reduced rates of natural transformation as a  
21 result of poor TfoS induction. Loss of natural transformation in the GlcNAc and (GlcNAc)<sub>2</sub>  
22 transporter double mutant would not be predicted to diminish TfoS induction, however,  
23 loss of these uptake transporters may slow growth to a level where the competence  
24 machinery is no longer efficiently expressed. Alternatively, it is possible that the  
25 cytoplasmic chitin degradation products internalized by the GlcNAc and (GlcNAc)<sub>2</sub>  
26 transporters aid in competence induction. However, previous work has shown that  
27 artificial activation of TfoS supports competence induction in rich medium even in the  
28 absence of chitin (Dalia et al., 2014a; Dalia, 2016).

29  
30 Chitin is the second most abundant biomolecule in nature (after cellulose) and represents  
31 an abundant waste product of the seafood industry (Yan and Chen, 2015). The genes

defined here may represent the minimal gene set required for efficient chitin utilization, which can be transferred to relevant non-chitinolytic microorganisms for biotech applications. This will be a focus of future work.

In conclusion, this study systematically defines the chitinases and transporters that are necessary and sufficient for chitin degradation and utilization in *V. cholerae*. Also, it identifies the unique requirements for chitin-induced horizontal gene transfer by natural transformation in this important human pathogen.

## EXPERIMENTAL PROCEDURES

### *Bacterial strains and culture conditions*

Strains were routinely grown in LB broth and on LB agar plates. When necessary, media was supplemented with streptomycin (100 µg/mL), spectinomycin (200 µg/mL), kanamycin (50 µg/mL), trimethoprim (10 µg/mL), or carbenicillin (100 µg/mL). Strains in this study are all derived from E7946 (Miller et al., 1989). All strains used in this study are listed in **Table S1**.

For growth on chitin as the sole carbon source, we used M9 minimal medium (Difco) supplemented with 30 µM FeSO<sub>4</sub> and ~1% chitin from shrimp shells (Sigma). To 1 mL of M9+chitin medium, ~10<sup>5</sup> cells were added and grown for 48 hours at 30°C for each growth reaction. Reactions were then plated for viable counts to assess growth. For reactions with strains containing a pMMB plasmid, carbenicillin (20µg/mL) was added to M9+chitin reactions to maintain the plasmid, and IPTG (100 µM) was added to induce expression.

### *Generating mutant strains and constructs*

All mutants were generated by natural cotransformation and MuGENT as previously described (Dalia et al., 2014b). Briefly, mutant constructs were generated by splicing-by-overlap extension (SOE) PCR as previously described (Dalia et al., 2013). For cotransformation and MuGENT, a selected product (i.e. one conferring resistance to an antibiotic) was used as the transforming DNA in conjunction with an unselected product (i.e. one that will confer the mutation of interest). By selecting for integration of the

selected product, we increase the likelihood that the unselected mutation will have integrated into cells within a competent population. We then screen for the mutation of interest in these cells by multiplex allele specific colony PCR (MASC-PCR) exactly as previously described (Wang et al., 2009). All chitinase and transporter mutations were generated using unselected SOE products. All expression constructs were generated by traditional cloning and C-terminal FLAG tags were added by site-directed mutagenesis as previously described (Edelheit et al., 2009). All primers used to generate mutant constructs and plasmids are listed in **Table S2**.

### *Natural transformation assays*

We tested chitin-induced natural transformation essentially as previously described (Dalia et al., 2015). Briefly,  $\sim 10^8$  cells were incubated in a 1 mL reaction of instant ocean medium (7 g/L; Aquarium Systems) containing  $\sim 8$  mg of chitin. Cells were incubated in this medium at 30°C statically for 16-24 hours to induce competence. Then, transforming DNA (tDNA) was added. For all natural transformation assays in this study, we used  $\sim 500$  ng of a PCR product that would replace the frame-shifted transposase VC1807 with a trimethoprim resistance cassette. Reactions were incubated for 5-24 hours with tDNA, and then 1 mL of LB was added to outgrow reactions. The transformation efficiency was then determined by plating reactions for viable counts on LB+Tm10 (transformants) and plain LB (total viable counts).

For chitin-independent transformation assays, strains containing pMMB-tfoX were grown overnight in LB with 100  $\mu$ g/mL carbenicillin and 100  $\mu$ M IPTG. Then,  $\sim 10^8$  cells were diluted into instant ocean medium containing 100  $\mu$ g/mL IPTG. Next, tDNA was added and incubated statically at 30°C for 5-24 hours. Then, reactions were outgrown and plated as described above to determine the transformation efficiency.

### *RNA-seq*

RNA was prepped for sequencing on the Illumina platform exactly as previously described (Shishkin et al., 2015). Reads obtained were mapped to the N16961 reference genome (NC\_002505 and NC\_002506) and analyzed using the Tufts University Galaxy server (Afgan

et al., 2016). Reads were aggregated within ORFs and normalized for the size of the ORF to obtain normalized transcript abundance for each gene under each condition tested.

### *Western blot analysis*

Western blots were conducted essentially as previously described (Burnette, 1981; Dalia et al., 2015). Briefly, samples were prepared for western blots by growing strains to mid-log in 20 µg/mL carbenicillin and 100µM IPTG. Cells were then spun and cell free supernatants were collected and boiled in SDS PAGE sample buffer. The cell pellets were then washed and resuspended with an equal volume of 0.5X IO and then boiled in SDS PAGE sample buffer. Samples were electrophoretically separated on 10% polyacrylamide gels and transferred to a nitrocellulose membrane. FLAG-tagged proteins were probed using rabbit polyclonal α-FLAG antibodies (Sigma), while RpoA was probed using a mouse monoclonal antibody (Biolegend). Blots were developed using IRDye 800CW labeled α-rabbit or α-mouse secondary antibodies as appropriate and imaged using a LI-COR Imaging system.

## **ACKNOWLEDGEMENTS**

We would like to thank Neil Greene for critical reading of this manuscript. Also, we thank the Malcolm Winkler and Julia van Kessel labs for reagents and advice. This work was supported by US National Institutes of Health Grant AI118863 and startup funds from the Indiana University College of Arts and Sciences to ABD.

## **REFERENCES**

- Afgan, E., Baker, D., van den Beek, M., Blankenberg, D., Bouvier, D., Cech, M. et al. (2016) The Galaxy platform for accessible, reproducible and collaborative biomedical analyses: 2016 update. *Nucleic Acids Res* **44**: W3-W10.
- Bassler, B.L., Yu, C., Lee, Y.C., and Roseman, S. (1991) Chitin utilization by marine bacteria. Degradation and catabolism of chitin oligosaccharides by *Vibrio furnissii*. *J Biol Chem* **266**: 24276-24286.
- Burnette, W.N. (1981) "Western blotting": electrophoretic transfer of proteins from sodium dodecyl sulfate--polyacrylamide gels to unmodified nitrocellulose and radiographic detection with antibody and radioiodinated protein A. *Anal Biochem* **112**: 195-203.

1 Colwell, R.R., Huq, A., Islam, M.S., Aziz, K.M., Yunus, M., Khan, N.H. et al. (2003) Reduction of  
2 cholera in Bangladeshi villages by simple filtration. *Proc Natl Acad Sci U S A* **100**: 1051-  
3 1055.

4 Dalia, A.B. (2016) RpoS is required for natural transformation of *Vibrio cholerae* through  
5 regulation of chitinases. *Environ Microbiol* **18**: 3758-3767.

6 Dalia, A.B., Lazinski, D.W., and Camilli, A. (2013) Characterization of undermethylated sites  
7 in *Vibrio cholerae*. *J Bacteriol* **195**: 2389-2399.

8 Dalia, A.B., Lazinski, D.W., and Camilli, A. (2014a) Identification of a membrane-bound  
9 transcriptional regulator that links chitin and natural competence in *Vibrio cholerae*. *MBio*  
10 **5**: e01028-01013.

11 Dalia, A.B., McDonough, E., and Camilli, A. (2014b) Multiplex genome editing by natural  
12 transformation. *Proc Natl Acad Sci U S A* **111**: 8937-8942.

13 Dalia, A.B., Seed, K.D., Calderwood, S.B., and Camilli, A. (2015) A globally distributed mobile  
14 genetic element inhibits natural transformation of *Vibrio cholerae*. *Proc Natl Acad Sci U S A*  
15 **112**: 10485-10490.

16 Edelheit, O., Hanukoglu, A., and Hanukoglu, I. (2009) Simple and efficient site-directed  
17 mutagenesis using two single-primer reactions in parallel to generate mutants for protein  
18 structure-function studies. *BMC Biotechnol* **9**: 61.

19 Furste, J.P., Pansegrau, W., Frank, R., Blocker, H., Scholz, P., Bagdasarian, M., and Lanka, E.  
20 (1986) Molecular cloning of the plasmid RP4 primase region in a multi-host-range tacP  
21 expression vector. *Gene* **48**: 119-131.

22 Hayes, C.A., Dalia, T.N., and Dalia, A.B. (2017) Systematic genetic dissection of PTS in *Vibrio*  
23 *cholerae* uncovers a novel glucose transporter and a limited role for PTS during infection of  
24 a mammalian host. *Mol Microbiol*.

25 Hunt, D.E., Gevers, D., Vahora, N.M., and Polz, M.F. (2008) Conservation of the chitin  
26 utilization pathway in the Vibrionaceae. *Appl Environ Microbiol* **74**: 44-51.

27 Huq, A., Small, E.B., West, P.A., Huq, M.I., Rahman, R., and Colwell, R.R. (1983) Ecological  
28 relationships between *Vibrio cholerae* and planktonic crustacean copepods. *Appl Environ*  
29 *Microbiol* **45**: 275-283.

1 Keyhani, N.O., and Roseman, S. (1996a) The chitin catabolic cascade in the marine  
2 bacterium *Vibrio furnissii*. Molecular cloning, isolation, and characterization of a  
3 periplasmic beta-N-acetylglucosaminidase. *J Biol Chem* **271**: 33425-33432.

4 Keyhani, N.O., and Roseman, S. (1996b) The chitin catabolic cascade in the marine  
5 bacterium *Vibrio furnissii*. Molecular cloning, isolation, and characterization of a  
6 periplasmic chitodextrinase. *J Biol Chem* **271**: 33414-33424.

7 Keyhani, N.O., Li, X.B., and Roseman, S. (2000) Chitin catabolism in the marine bacterium  
8 *Vibrio furnissii*. Identification and molecular cloning of a chitoporin. *J Biol Chem* **275**:  
9 33068-33076.

10 Li, X., and Roseman, S. (2004) The chitinolytic cascade in *Vibrios* is regulated by chitin  
11 oligosaccharides and a two-component chitin catabolic sensor/kinase. *Proc Natl Acad Sci U*  
12 *SA* **101**: 627-631.

13 Loose, J.S., Forsberg, Z., Fraaije, M.W., Eijsink, V.G., and Vaaje-Kolstad, G. (2014) A rapid  
14 quantitative activity assay shows that the *Vibrio cholerae* colonization factor GbpA is an  
15 active lytic polysaccharide monooxygenase. *FEBS Lett* **588**: 3435-3440.

16 Meibom, K.L., Blokesch, M., Dolganov, N.A., Wu, C.Y., and Schoolnik, G.K. (2005) Chitin  
17 induces natural competence in *Vibrio cholerae*. *Science* **310**: 1824-1827.

18 Meibom, K.L., Li, X.B., Nielsen, A.T., Wu, C.Y., Roseman, S., and Schoolnik, G.K. (2004) The  
19 *Vibrio cholerae* chitin utilization program. *Proc Natl Acad Sci U S A* **101**: 2524-2529.

20 Miller, V.L., DiRita, V.J., and Mekalanos, J.J. (1989) Identification of *toxS*, a regulatory gene  
21 whose product enhances *toxR*-mediated activation of the cholera toxin promoter. *J*  
22 *Bacteriol* **171**: 1288-1293.

23 Mondal, M., and Chatterjee, N.S. (2016) Role of *Vibrio cholerae* exochitinase ChiA2 in  
24 horizontal gene transfer. *Can J Microbiol* **62**: 201-209.

25 Seitz, P., and Blokesch, M. (2013) DNA-uptake machinery of naturally competent *Vibrio*  
26 *cholerae*. *Proc Natl Acad Sci U S A* **110**: 17987-17992.

27 Shishkin, A.A., Giannoukos, G., Kucukural, A., Ciulla, D., Busby, M., Surka, C. et al. (2015)  
28 Simultaneous generation of many RNA-seq libraries in a single reaction. *Nat Methods* **12**:  
29 323-325.



- 1 Suginta, W., Chumjan, W., Mahendran, K.R., Schulte, A., and Winterhalter, M. (2013)
- 2 Chitoporin from *Vibrio harveyi*, a channel with exceptional sugar specificity. *J Biol Chem*
- 3 **288**: 11038-11046.
- 4 Suzuki, K., Sugawara, N., Suzuki, M., Uchiyama, T., Katouno, F., Nikaidou, N., and Watanabe,
- 5 T. (2002) Chitinases A, B, and C1 of *Serratia marcescens* 2170 produced by recombinant
- 6 *Escherichia coli*: enzymatic properties and synergism on chitin degradation. *Biosci*
- 7 *Biotechnol Biochem* **66**: 1075-1083.
- 8 Wang, H.H., Isaacs, F.J., Carr, P.A., Sun, Z.Z., Xu, G., Forest, C.R., and Church, G.M. (2009)
- 9 Programming cells by multiplex genome engineering and accelerated evolution. *Nature*
- 10 **460**: 894-898.
- 11 Watve, S.S., Thomas, J., and Hammer, B.K. (2015) CytR Is a Global Positive Regulator of
- 12 Competence, Type VI Secretion, and Chitinases in *Vibrio cholerae*. *PLoS One* **10**: e0138834.
- 13 Yan, N., and Chen, X. (2015) Sustainability: Don't waste seafood waste. *Nature* **524**: 155-
- 14 157.

## 15 **FIGURE LEGENDS**

16 **Fig. 1** – *Characterizing chitinase single mutants for growth on chitin and natural*  
17 *transformation. (A)* Growth of the indicated mutant strains in M9 minimal medium with  
18 *chitin as a sole carbon source. (B)* Chitin-induced natural transformation of the indicated  
19 *mutant strains. All data are shown as the mean ± SD and are from at least 3 independent*  
20 *biological replicates. \*\*\* =  $p < 0.001$ .*

21  
22  
23  
24 **Fig. 2** - *MuGENT for systematic inactivation of all 7 chitinase-like genes. (A)* Chromosomal  
25 *map of the location of the seven chitinases inactivated in this study. (B)* MASC-PCR of the  
26 *indicated mutants. The presence of a band indicates that the gene indicated to the left is*  
27 *inactivated, while the absence of a band indicates that this gene is intact.*

28  
29 **Fig. 3** - *ChiA2 is sufficient for natural transformation, but not growth on chitin. (A)* Growth of  
30 *the indicated mutant strains in M9 medium with chitin as a sole carbon source. (B)* Chitin-  
31 *induced natural transformation of the indicated mutant strains. (C)* Chitin-independent

natural transformation assay of the indicated mutants. TfoX was induced in these experiments with 100  $\mu$ M IPTG. All data are shown as the mean  $\pm$  SD and are from at least 3 independent biological replicates. \* =  $p < 0.05$ , \*\*\* =  $p < 0.001$ , NS = not significant.

**Fig. 4** – *Overexpression of single chitinases in a  $\Delta 7$  strain recovers natural transformation but not growth on chitin.* (A) Relative transcript abundance of the indicated genes from RNA-seq data. (B) Growth of the indicated mutant strains in M9 medium containing chitin as a sole carbon source. (C) Growth of the indicated mutant strains in M9 medium with chitin as a sole carbon source. (D) Chitin-induced natural transformation of the indicated mutant strains. Genes were induced in B, C and D with 100  $\mu$ M IPTG. (E) Western blot analysis of strains in the  $\Delta 7$  background harboring a pMMB expression construct with the C-terminally FLAG tagged chitinase indicated. Supernatant (S) and pellet (P) fractions were run for each strain and probed with  $\alpha$ -FLAG (top) and  $\alpha$ -RpoA (bottom) antibodies. All data in A-D are shown as the mean  $\pm$  SD and are from at least 3 independent biological replicates. \* =  $p < 0.05$ , \*\* =  $p < 0.01$ , and \*\*\* =  $p < 0.001$ , and NS = not significant.

**Fig. 5** – *ChiA2 and VCA0700 are sufficient for growth on chitin.* (A) Growth of the indicated mutant strains in M9 medium with chitin as a sole carbon source. (B) Chitin-induced natural transformation of the indicated mutant strains. (C) Growth of the indicated strains in M9 medium with chitin as the sole carbon source and 100  $\mu$ M IPTG. All data are shown as the mean  $\pm$  SD and are from at least 3 independent biological replicates. \*\*\* =  $p < 0.001$ , NS = not significant.

**Fig. 6** – *Role of chitin transporters for growth on chitin and chitin-induced natural transformation.* (A) Growth of the indicated mutant strains in M9 medium with chitin as a sole carbon source. (B) Chitin-induced natural transformation of the indicated mutant strains. All data are shown as the mean  $\pm$  SD and are from at least 3 independent biological replicates. All statistical comparisons in A and B were made between the indicated mutant and the WT. \* =  $p < 0.05$ , \*\* =  $p < 0.01$ , and \*\*\* =  $p < 0.001$ .

**Fig. 7** – *Schematic of the chitin utilization pathway genetically dissected in this study.* First, extracellular chitinases degrade insoluble chitin into soluble chitin oligosaccharides. While ChiA2 is the dominant enzyme required for this process, the chitinases ChiA1, VC0769, VC1073, and VCA0700 likely play some role. These soluble oligosaccharides are then taken up across the outer membrane (OM) and into the periplasm via the chitoporin encoded by VC0972. Then, these oligosaccharides are likely further broken down by the chitodextrinase VCA0700 into (GlcNAc)<sub>2</sub> (aka chitobiose), GlcNAc, and (GlcN)<sub>2</sub>, which are taken up across the inner membrane (IM) into the cytoplasm by the transporters encoded by VC0618-0619, VC0995, and VC1282, respectively. Our results indicate that for robust growth on chitin, the transporters responsible for uptake of chitobiose and GlcNAc play the largest role.

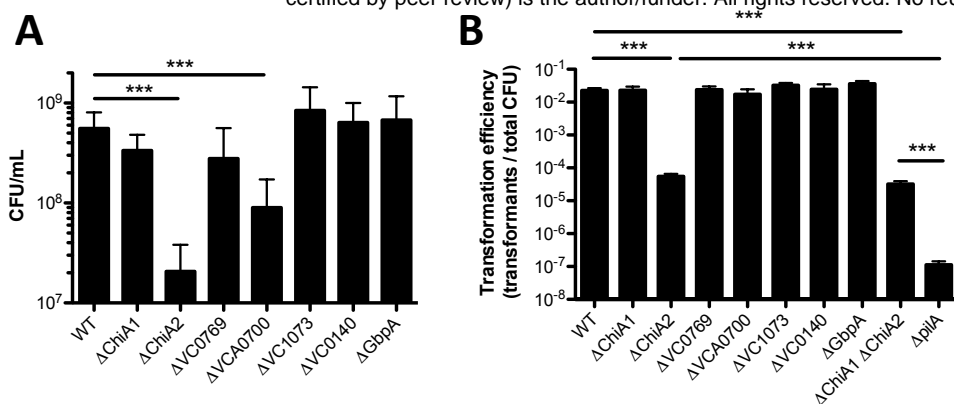

**Fig. 1** – Characterizing chitinase single mutants for growth on chitin and natural transformation. **(A)** Growth of the indicated mutant strains in M9 minimal medium with chitin as a sole carbon source. **(B)** Chitin-induced natural transformation of the indicated mutant strains. All data are shown as the mean  $\pm$  SD and are from at least 3 independent biological replicates. \*\*\* =  $p < 0.001$ .

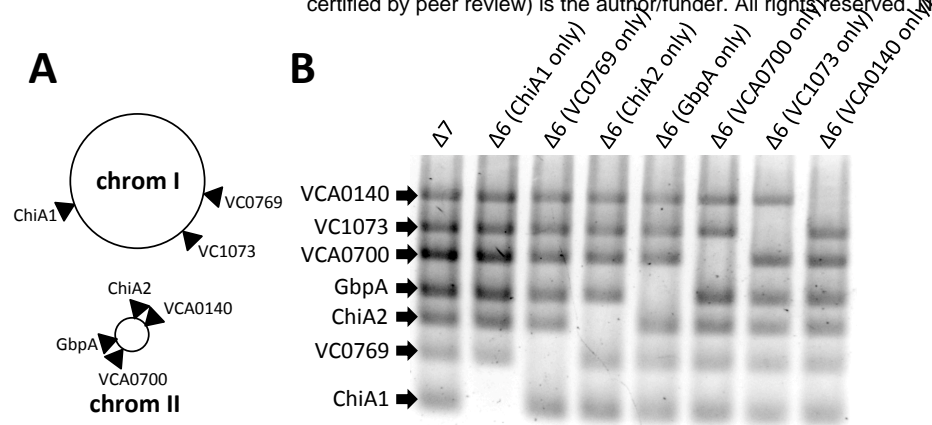

**Fig. 2 - MuGENT for systematic inactivation of all 7 chitinase-like genes. (A)** Chromosomal map of the location of the seven chitinases inactivated in this study. **(B)** MASC-PCR of the indicated mutants. The presence of a band indicates that the gene indicated to the left is inactivated, while the absence of a band indicates that this gene is intact.

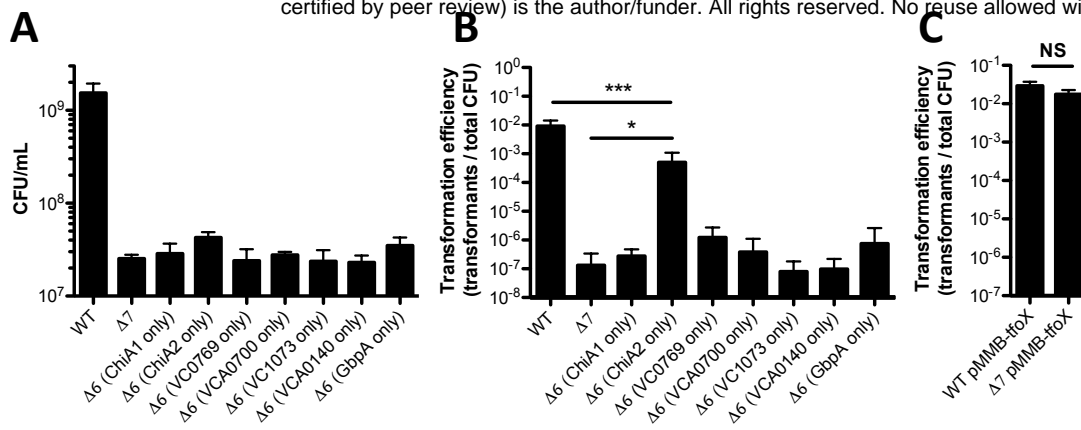

**Fig. 3 - *ChiA2* is sufficient for natural transformation, but not growth on chitin.** (A) Growth of the indicated mutant strains in M9 medium with chitin as a sole carbon source. (B) Chitin-induced natural transformation of the indicated mutant strains. (C) Chitin-independent natural transformation assay of the indicated mutants. TfoX was induced in these experiments with 100  $\mu$ M IPTG. All data are shown as the mean  $\pm$  SD and are from at least 3 independent biological replicates. \* =  $p < 0.05$ , \*\*\* =  $p < 0.001$ , NS = not significant.

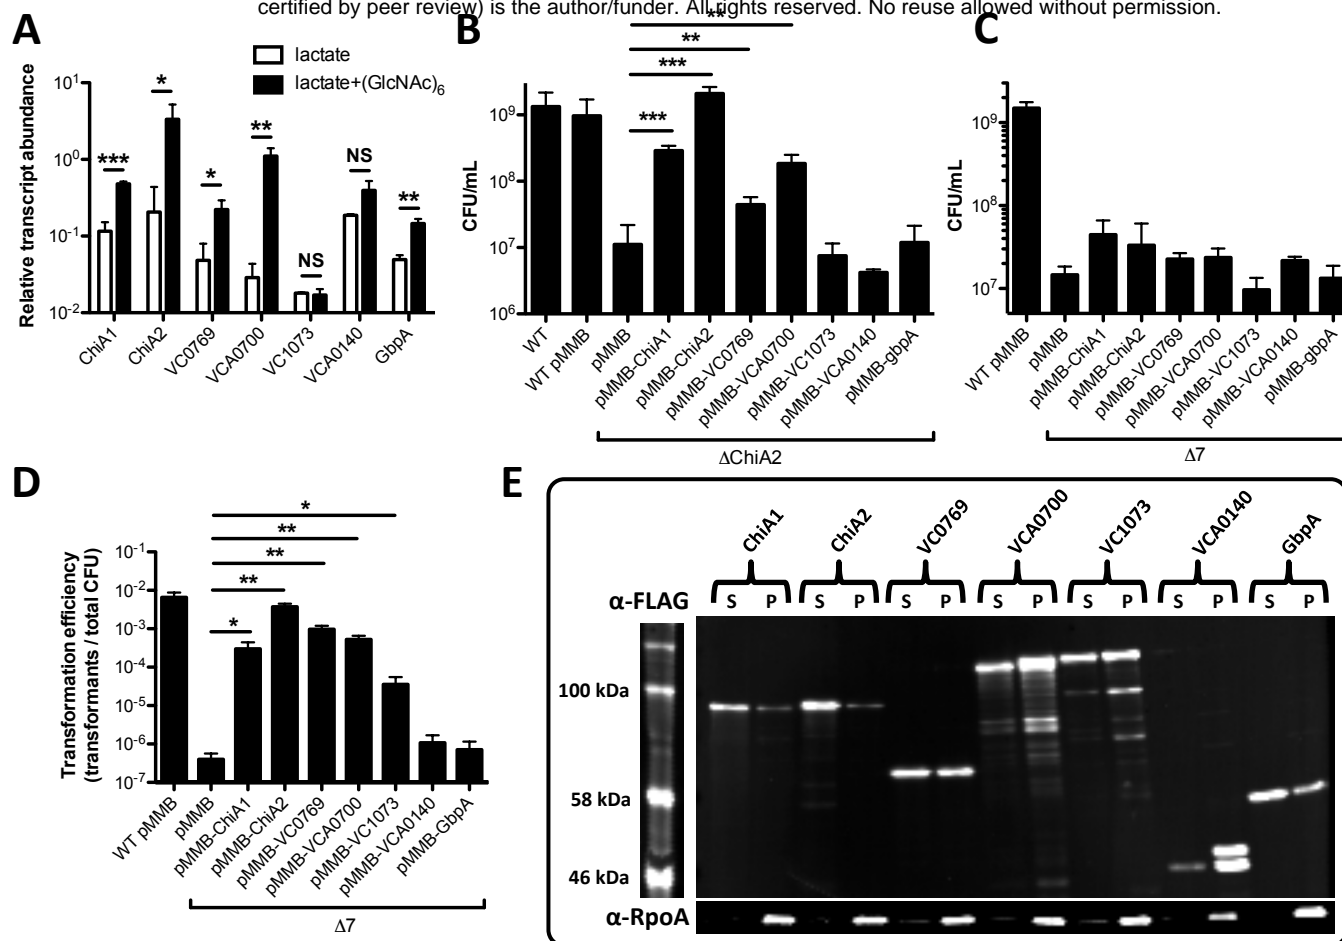

**Fig. 4 – Overexpression of single chitinases in a  $\Delta$ 7 strain recovers natural transformation but not growth on chitin.** (A) Relative transcript abundance of the indicated genes from RNA-seq data. (B) Growth of the indicated mutant strains in M9 medium containing chitin as a sole carbon source. (C) Growth of the indicated mutant strains in M9 medium with chitin as a sole carbon source. (D) Chitin-induced natural transformation of the indicated mutant strains. Genes were induced in B, C and D with 100  $\mu$ M IPTG. (E) Western blot analysis of strains in the  $\Delta$ 7 background harboring a pMMB expression construct with the C-terminally FLAG tagged chitinase indicated. Supernatant (S) and pellet (P) fractions were run for each strain and probed with  $\alpha$ -FLAG (top) and  $\alpha$ -RpoA (bottom) antibodies. All data in A-D are shown as the mean  $\pm$  SD and are from at least 3 independent biological replicates. \* =  $p < 0.05$ , \*\* =  $p < 0.01$ , and \*\*\* =  $p < 0.001$ , and NS = not significant.



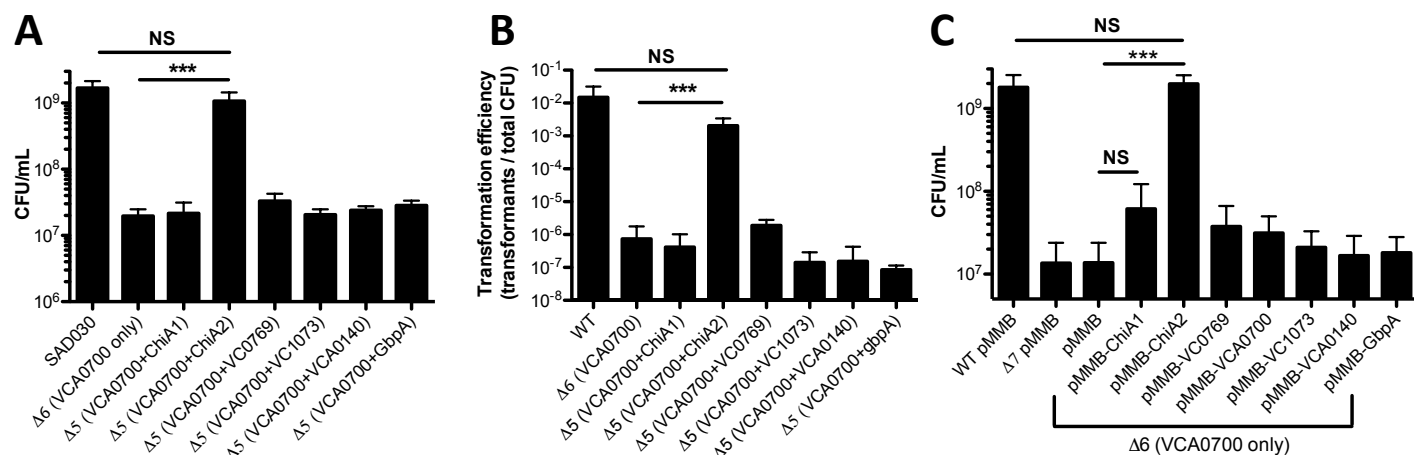

**Fig. 5 – ChiA2 and VCA0700 are sufficient for growth on chitin.** (A) Growth of the indicated mutant strains in M9 medium with chitin as a sole carbon source. (B) Chitin-induced natural transformation of the indicated mutant strains. (C) Growth of the indicated strains in M9 medium with chitin as the sole carbon source and 100  $\mu$ M IPTG. All data are shown as the mean  $\pm$  SD and are from at least 3 independent biological replicates. \*\*\* =  $p < 0.001$ , NS = not significant.

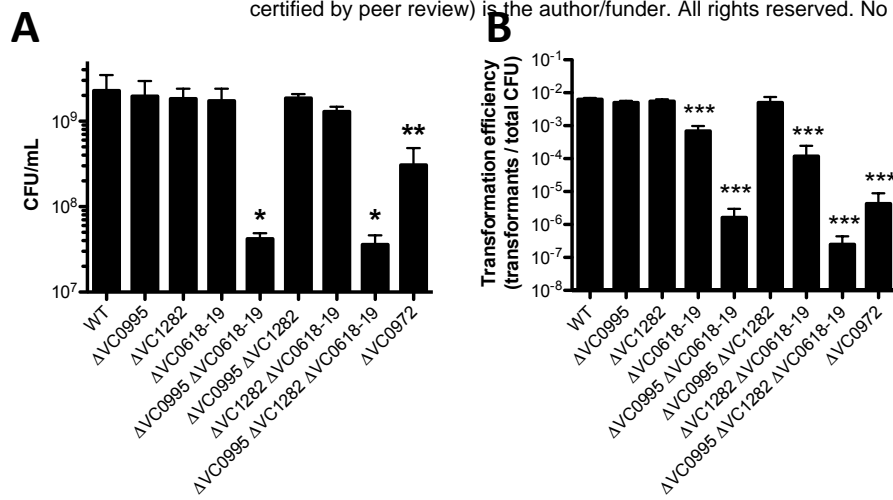

**Fig. 6 – Role of chitin transporters for growth on chitin and chitin-induced natural transformation.** (A) Growth of the indicated mutant strains in M9 medium with chitin as a sole carbon source. (B) Chitin-induced natural transformation of the indicated mutant strains. All data are shown as the mean ± SD and are from at least 3 independent biological replicates. All statistical comparisons in A and B were made between the indicated mutant and the WT. \* =  $p < 0.05$ , \*\* =  $p < 0.01$ , and \*\*\* =  $p < 0.001$ .

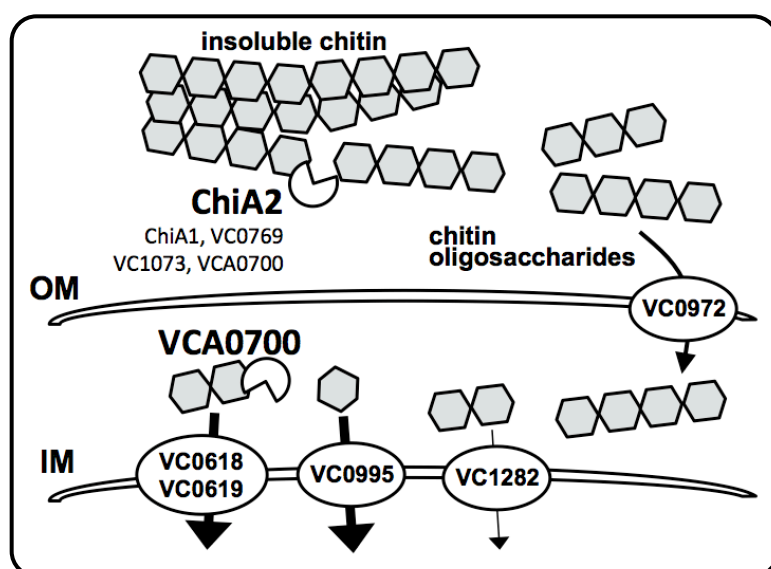

**Fig. 7** – Schematic of the chitin utilization pathway genetically dissected in this study. First, extracellular chitinases degrade insoluble chitin into soluble chitin oligosaccharides. While ChiA2 is the dominant enzyme required for this process, the chitinases ChiA1, VC0769, VC1073, and VCA0700 likely play some role. These soluble oligosaccharides are then taken up across the outer membrane (OM) and into the periplasm via the chitoporin encoded by VC0972. Then, these oligosaccharides are likely further broken down by the chitodextrinase VCA0700 into (GlcNAc)<sub>2</sub> (aka chitobiose), GlcNAc, and (GlcN)<sub>2</sub>, which are taken up across the inner membrane (IM) into the cytoplasm by the transporters encoded by VC0618-0619, VC0995, and VC1282, respectively. Our results indicate that for robust growth on chitin, the transporters responsible for uptake of chitobiose and GlcNAc play the largest role.

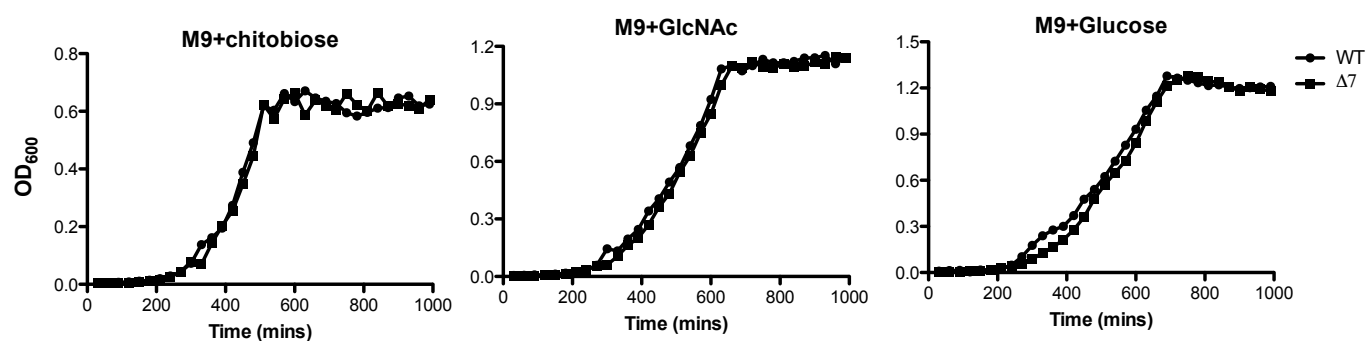

**Fig. S1** – A chitinase deficient strain is still capable of growth on the chitin degradation products chitobiose and GlcNAc. Growth curves of wildtype (black circles) and  $\Delta 7$  chitinase strain (black squares) in M9 minimal medium supplemented with the carbon source indicated above each graph.

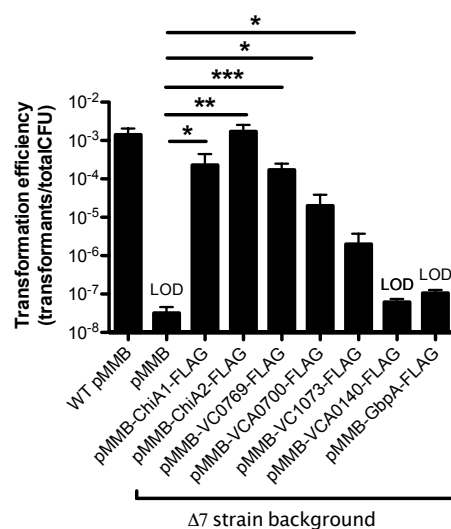

**Fig. S2** – *C-terminally FLAG tagged chitinases are functional*. Natural transformation assay of the indicated strains. All strains were incubated on chitin with Carbenicillin (20 µg/mL) and IPTG (100 µg/mL). Data are from at least three independent biological replicates and shown as the mean ± SD. \* =  $p < 0.05$ , \*\* =  $p < 0.01$ , \*\*\* =  $p < 0.001$ , and LOD = limit of detection.

**Table S1 – Strains used in this study**

| Strain name in manuscript | Genotype and antibiotic resistances   | Description                                                                                                             | Reference / (strain#)             |
|---------------------------|---------------------------------------|-------------------------------------------------------------------------------------------------------------------------|-----------------------------------|
| WT                        | E7946 Sm <sup>R</sup>                 | Wildtype <i>V. cholerae</i> O1 El Tor strain used throughout this study – parent strain for all mutants indicated below | (Miller et al., 1989)<br>(SAD030) |
| ΔChiA1                    | ΔChiA1                                | Wildtype with a 500bp deletion in the 5' end of the ChiA1 gene                                                          | This Study<br>(CAH060 / SAD1333)  |
| ΔChiA2                    | ΔChiA2                                | Wildtype with a 500bp deletion in the 5' end of the ChiA2 gene                                                          | This Study<br>(CAH061 / SAD1334)  |
| ΔVC0769                   | ΔVC0769                               | Wildtype with a 500bp deletion in the 5' end of the VC0769 gene                                                         | This Study<br>(CAH062 / SAD1335)  |
| ΔVCA0700                  | ΔVCA0700                              | Wildtype with a 500bp deletion in the 5' end of the VCA0700 gene                                                        | This Study<br>(CAH064 / SAD1336)  |
| ΔVC1073                   | ΔVC1073                               | Wildtype with a 500bp deletion in the 5' end of the VC1073 gene                                                         | This Study<br>(CAH065 / SAD1337)  |
| ΔVCA0140                  | ΔVCA0140                              | Wildtype with a 500bp deletion in the 5' end of the VCA0140 gene                                                        | This Study<br>(CAH066 / SAD1338)  |
| ΔGbpA                     | ΔGbpA                                 | Wildtype with a 500bp deletion in the 5' end of the gbpA gene                                                           | This Study<br>(CAH063 / SAD1339)  |
| ΔChiA1 ΔChiA2             | ΔChiA1 ΔChiA2                         | Wildtype with a 500bp deletion in the 5' end of the ChiA1 and ChiA2 genes                                               | This Study<br>(SAD863)            |
| ΔpilA                     | ΔpilA::Spec <sup>R</sup>              | The pilA gene (VC2423) was deleted and replaced with a spectinomycin resistance cassette in the wildtype                | This Study<br>(SAD780)            |
| WT pMMB                   | pMMB Carb <sup>R</sup>                | Wildtype with pMMB67EH empty vector                                                                                     | This Study<br>(CAH298 / SAD1340)  |
| ΔChiA2 pMMB               | ΔChiA2 pMMB Carb <sup>R</sup>         | ΔChiA2 mutant with pMMB67EH empty vector                                                                                | This Study<br>(CAH458 / SAD1341)  |
| ΔChiA2 pMMB-ChiA1         | ΔChiA2 pMMB-ChiA1 Carb <sup>R</sup>   | ΔChiA2 mutant with pMMB67EH containing ChiA1 – cloned into the EcoRI and BamHI sites of the MCS.                        | This Study<br>(CAH469 / SAD1342)  |
| ΔChiA2 pMMB-ChiA2         | ΔChiA2 pMMB-ChiA2 Carb <sup>R</sup>   | ΔChiA2 mutant with pMMB67EH containing ChiA2 – cloned into the EcoRI and BamHI sites of the MCS.                        | This Study<br>(CAH463 / SAD1343)  |
| ΔChiA2 pMMB-VC0769        | ΔChiA2 pMMB-VC0769 Carb <sup>R</sup>  | ΔChiA2 mutant with pMMB67EH containing VC0769 – cloned into the EcoRI and BamHI sites of the MCS.                       | This Study<br>(CAH464 / SAD1344)  |
| ΔChiA2 pMMB-              | ΔChiA2 pMMB-VCA0700 Carb <sup>R</sup> | ΔChiA2 mutant with pMMB67EH                                                                                             | This Study                        |

|                     |                                                                                                                       |                                                                                                                                                                                                                          |                               |
|---------------------|-----------------------------------------------------------------------------------------------------------------------|--------------------------------------------------------------------------------------------------------------------------------------------------------------------------------------------------------------------------|-------------------------------|
| VCA0700             |                                                                                                                       | containing VCA0700 – cloned into the EcoRI and BamHI sites of the MCS.                                                                                                                                                   | (CAH465 / SAD1345)            |
| ΔChiA2 pMMB-VC1073  | ΔChiA2 pMMB-VC1073 Carb <sup>R</sup>                                                                                  | ΔChiA2 mutant with pMMB67EH containing VC1073 – cloned into the EcoRI and BamHI sites of the MCS.                                                                                                                        | This Study (CAH467 / SAD1346) |
| ΔChiA2 pMMB-VCA0140 | ΔChiA2 pMMB-VCA0140 Carb <sup>R</sup>                                                                                 | ΔChiA2 mutant with pMMB67EH containing VCA0140 – cloned into the EcoRI and BamHI sites of the MCS.                                                                                                                       | This Study (CAH468 / SAD1347) |
| ΔChiA2 pMMB-GbpA    | ΔChiA2 pMMB-GbpA Carb <sup>R</sup>                                                                                    | ΔChiA2 mutant with pMMB67EH containing GbpA – cloned into the EcoRI and BamHI sites of the MCS.                                                                                                                          | This Study (CAH466 / SAD1348) |
| Δ7                  | ΔChiA1, ΔChiA2, ΔVC0769, ΔVCA0700, ΔVC1073, ΔVCA0140, ΔGbpA, ΔVC1807::Spec <sup>R</sup>                               | All seven chitinases were inactivated by MuGENT. VC1807 was inactivated as the neutral locus throughout this process with a resistance cassette to serve as the selected product. VC1807 is a frame-shifted transposase. | This Study (CAH130 / SAD1349) |
| Δ6 (ChiA1 only)     | ΔChiA2, ΔVC0769, ΔVCA0700, ΔVC1073, ΔVCA0140, ΔGbpA, ΔVC1807::Kan <sup>R</sup>                                        | The indicated chitinase was restored in the Δ7 mutant by cotransformation.                                                                                                                                               | This Study (CAH165 / SAD1350) |
| Δ6 (ChiA2 only)     | ΔChiA1, ΔVC0769, ΔVCA0700, ΔVC1073, ΔVCA0140, ΔGbpA, ΔVC1807::Kan <sup>R</sup>                                        | The indicated chitinase was restored in the Δ7 mutant by cotransformation.                                                                                                                                               | This Study (CAH166 / SAD1351) |
| Δ6 (VC0769 only)    | ΔChiA1, ΔChiA2, ΔVCA0700, ΔVC1073, ΔVCA0140, ΔGbpA, ΔVC1807::Kan <sup>R</sup>                                         | The indicated chitinase was restored in the Δ7 mutant by cotransformation.                                                                                                                                               | This Study (CAH163 / SAD1352) |
| Δ6 (VCA0700 only)   | ΔChiA1, ΔChiA2, ΔVC0769, ΔVC1073, ΔVCA0140, ΔGbpA, ΔVC1807::Kan <sup>R</sup>                                          | The indicated chitinase was restored in the Δ7 mutant by cotransformation.                                                                                                                                               | This Study (CAH169 / SAD1353) |
| Δ6 (VC1073 only)    | ΔChiA1, ΔChiA2, ΔVC0769, ΔVCA0700, ΔVCA0140, ΔGbpA, ΔVC1807::Kan <sup>R</sup>                                         | The indicated chitinase was restored in the Δ7 mutant by cotransformation.                                                                                                                                               | This Study (CAH164 / SAD1354) |
| Δ6 (VCA0140 only)   | ΔChiA1, ΔChiA2, ΔVC0769, ΔVCA0700, ΔVC1073, ΔGbpA, ΔVC1807::Kan <sup>R</sup>                                          | The indicated chitinase was restored in the Δ7 mutant by cotransformation.                                                                                                                                               | This Study (CAH167 / SAD1355) |
| Δ6 (GbpA only)      | ΔChiA1, ΔChiA2, ΔVC0769, ΔVCA0700, ΔVC1073, ΔVCA0140, ΔVC1807::Kan <sup>R</sup>                                       | The indicated chitinase was restored in the Δ7 mutant by cotransformation.                                                                                                                                               | This Study (CAH168 / SAD1356) |
| WT pMMB-tfoX        | pMMB-tfoX Carb <sup>R</sup>                                                                                           | Wildtype with pMMB67EH containing the tfoX gene (VC1153) cloned into the EcoRI and BamHI sites of the MCS                                                                                                                | This Study (SAD614)           |
| Δ7 pMMB-tfoX        | ΔChiA1, ΔChiA2, ΔVC0769, ΔVCA0700, ΔVC1073, ΔVCA0140, ΔGbpA, ΔVC1807::Spec <sup>R</sup> , pMMB-tfoX Carb <sup>R</sup> | Δ7 mutant with pMMB67EH containing the tfoX gene (VC1153) cloned into the EcoRI and BamHI sites of the MCS                                                                                                               | This Study (CAH126 / SAD1357) |
| Δ7 pMMB             | ΔChiA1, ΔChiA2, ΔVC0769, ΔVCA0700, ΔVC1073, ΔVCA0140, ΔGbpA,                                                          | Δ7 with pMMB67EH empty vector                                                                                                                                                                                            | This Study (CAH299 / SAD1358) |



|                                       |                                                                                                                                                                                      |                                                                                                        |                               |
|---------------------------------------|--------------------------------------------------------------------------------------------------------------------------------------------------------------------------------------|--------------------------------------------------------------------------------------------------------|-------------------------------|
|                                       | $\Delta VC1807::Spec^R$ , pMMB Carb <sup>R</sup>                                                                                                                                     |                                                                                                        |                               |
| $\Delta 7$ pMMB-ChiA1                 | $\Delta ChiA1$ , $\Delta ChiA2$ , $\Delta VC0769$ , $\Delta VCA0700$ , $\Delta VC1073$ , $\Delta VCA0140$ , $\Delta GbpA$ , $\Delta VC1807::Spec^R$ , pMMB-ChiA1 Carb <sup>R</sup>   | $\Delta 7$ mutant with pMMB67EH containing ChiA1 – cloned into the EcoRI and BamHI sites of the MCS.   | This Study (CAH460 / SAD1359) |
| $\Delta 7$ pMMB-ChiA2                 | $\Delta ChiA1$ , $\Delta ChiA2$ , $\Delta VC0769$ , $\Delta VCA0700$ , $\Delta VC1073$ , $\Delta VCA0140$ , $\Delta GbpA$ , $\Delta VC1807::Spec^R$ , pMMB-ChiA2 Carb <sup>R</sup>   | $\Delta 7$ mutant with pMMB67EH containing ChiA2 – cloned into the EcoRI and BamHI sites of the MCS.   | This Study (CAH269 / SAD1360) |
| $\Delta 7$ pMMB-VC0769                | $\Delta ChiA1$ , $\Delta ChiA2$ , $\Delta VC0769$ , $\Delta VCA0700$ , $\Delta VC1073$ , $\Delta VCA0140$ , $\Delta GbpA$ , $\Delta VC1807::Spec^R$ , pMMB-VC0769 Carb <sup>R</sup>  | $\Delta 7$ mutant with pMMB67EH containing VC0769 – cloned into the EcoRI and BamHI sites of the MCS.  | This Study (CAH270 / SAD1361) |
| $\Delta 7$ pMMB-VCA0700               | $\Delta ChiA1$ , $\Delta ChiA2$ , $\Delta VC0769$ , $\Delta VCA0700$ , $\Delta VC1073$ , $\Delta VCA0140$ , $\Delta GbpA$ , $\Delta VC1807::Spec^R$ , pMMB-VCA0700 Carb <sup>R</sup> | $\Delta 7$ mutant with pMMB67EH containing VCA0700 – cloned into the EcoRI and BamHI sites of the MCS. | This Study (CAH271 / SAD1362) |
| $\Delta 7$ pMMB-VC1073                | $\Delta ChiA1$ , $\Delta ChiA2$ , $\Delta VC0769$ , $\Delta VCA0700$ , $\Delta VC1073$ , $\Delta VCA0140$ , $\Delta GbpA$ , $\Delta VC1807::Spec^R$ , pMMB-VC1073 Carb <sup>R</sup>  | $\Delta 7$ mutant with pMMB67EH containing VC1073 – cloned into the EcoRI and BamHI sites of the MCS.  | This Study (CAH273 / SAD1363) |
| $\Delta 7$ pMMB-VCA0140               | $\Delta ChiA1$ , $\Delta ChiA2$ , $\Delta VC0769$ , $\Delta VCA0700$ , $\Delta VC1073$ , $\Delta VCA0140$ , $\Delta GbpA$ , $\Delta VC1807::Spec^R$ , pMMB-VCA0140 Carb <sup>R</sup> | $\Delta 7$ mutant with pMMB67EH containing VCA0140 – cloned into the EcoRI and BamHI sites of the MCS. | This Study (CAH274 / SAD1364) |
| $\Delta 7$ pMMB-GbpA                  | $\Delta ChiA1$ , $\Delta ChiA2$ , $\Delta VC0769$ , $\Delta VCA0700$ , $\Delta VC1073$ , $\Delta VCA0140$ , $\Delta GbpA$ , $\Delta VC1807::Spec^R$ , pMMB-GbpA Carb <sup>R</sup>    | $\Delta 7$ mutant with pMMB67EH containing GbpA – cloned into the EcoRI and BamHI sites of the MCS.    | This Study (CAH272 / SAD1365) |
| $\Delta 5$ (VCA0700 and ChiA1 only)   | $\Delta ChiA2$ , $\Delta VC0769$ , $\Delta VC1073$ , $\Delta VCA0140$ , $\Delta GbpA$ , $\Delta VC1807::Spec^R$                                                                      | Revert the indicated chitinase into the $\Delta 6$ background that only has VCA0700                    | This Study (CAH191 / SAD1366) |
| $\Delta 5$ (VCA0700 and ChiA2 only)   | $\Delta ChiA1$ , $\Delta VC0769$ , $\Delta VC1073$ , $\Delta VCA0140$ , $\Delta GbpA$ , $\Delta VC1807::Spec^R$                                                                      | Revert the indicated chitinase into the $\Delta 6$ background that only has VCA0700                    | This Study (CAH197 / SAD1367) |
| $\Delta 5$ (VCA0700 and VC0769 only)  | $\Delta ChiA1$ , $\Delta ChiA2$ , $\Delta VC1073$ , $\Delta VCA0140$ , $\Delta GbpA$ , $\Delta VC1807::Spec^R$                                                                       | Revert the indicated chitinase into the $\Delta 6$ background that only has VCA0700                    | This Study (CAH420 / SAD1368) |
| $\Delta 5$ (VCA0700 and VC1073 only)  | $\Delta ChiA1$ , $\Delta ChiA2$ , $\Delta VC0769$ , $\Delta VC1073$ , $\Delta GbpA$ , $\Delta VC1807::Spec^R$                                                                        | Revert the indicated chitinase into the $\Delta 6$ background that only has VCA0700                    | This Study (CAH421 / SAD1369) |
| $\Delta 5$ (VCA0700 and VCA0140 only) | $\Delta ChiA1$ , $\Delta ChiA2$ , $\Delta VC0769$ , $\Delta VC1073$ , $\Delta GbpA$ , $\Delta VC1807::Spec^R$                                                                        | Revert the indicated chitinase into the $\Delta 6$ background that only has VCA0700                    | This Study (CAH422 / SAD1370) |
| $\Delta 5$ (VCA0700 and GbpA only)    | $\Delta ChiA1$ , $\Delta ChiA2$ , $\Delta VC0769$ , $\Delta VC1073$ , $\Delta VCA0140$ , $\Delta VC1807::Spec^R$                                                                     | Revert the indicated chitinase into the $\Delta 6$ background that only has VCA0700                    | This Study (CAH423 / SAD1371) |

|                                   |                                                                                                                         |                                                                                                                             |                                     |
|-----------------------------------|-------------------------------------------------------------------------------------------------------------------------|-----------------------------------------------------------------------------------------------------------------------------|-------------------------------------|
| Δ6 (VCA0700 only)<br>pMMB         | ΔChiA1, ΔChiA2, ΔVC0769,<br>ΔVC1073, ΔVCA0140, ΔGbpA,<br>ΔVC1807::Kan <sup>R</sup> , pMMB Carb <sup>R</sup>             | Δ6 (VCA0700 only) mutant with<br>pMMB67EH empty vector                                                                      | This Study<br>(CAH424 /<br>SAD1372) |
| Δ6 (VCA0700 only)<br>pMMB-ChiA1   | ΔChiA1, ΔChiA2, ΔVC0769,<br>ΔVC1073, ΔVCA0140, ΔGbpA,<br>ΔVC1807::Kan <sup>R</sup> , pMMB-ChiA1<br>Carb <sup>R</sup>    | Δ6 (VCA0700 only) mutant with<br>with pMMB67EH containing<br>ChiA1 – cloned into the EcoRI and<br>BamHI sites of the MCS.   | This Study<br>(CAH462 /<br>SAD1373) |
| Δ6 (VCA0700 only)<br>pMMB-ChiA2   | ΔChiA1, ΔChiA2, ΔVC0769,<br>ΔVC1073, ΔVCA0140, ΔGbpA,<br>ΔVC1807::Kan <sup>R</sup> , pMMB-ChiA2<br>Carb <sup>R</sup>    | Δ6 (VCA0700 only) mutant with<br>with pMMB67EH containing<br>ChiA2 – cloned into the EcoRI and<br>BamHI sites of the MCS.   | This Study<br>(CAH425 /<br>SAD1374) |
| Δ6 (VCA0700 only)<br>pMMB-VC0769  | ΔChiA1, ΔChiA2, ΔVC0769,<br>ΔVC1073, ΔVCA0140, ΔGbpA,<br>ΔVC1807::Kan <sup>R</sup> , pMMB-VC0769<br>Carb <sup>R</sup>   | Δ6 (VCA0700 only) mutant with<br>with pMMB67EH containing<br>VC0769 – cloned into the EcoRI<br>and BamHI sites of the MCS.  | This Study<br>(CAH426 /<br>SAD1375) |
| Δ6 (VCA0700 only)<br>pMMB-VCA0700 | ΔChiA1, ΔChiA2, ΔVC0769,<br>ΔVC1073, ΔVCA0140, ΔGbpA,<br>ΔVC1807::Kan <sup>R</sup> , pMMB-<br>VCA0700 Carb <sup>R</sup> | Δ6 (VCA0700 only) mutant with<br>with pMMB67EH containing<br>VCA0700 – cloned into the EcoRI<br>and BamHI sites of the MCS. | This Study<br>(CAH427 /<br>SAD1376) |
| Δ6 (VCA0700 only)<br>pMMB-VC1073  | ΔChiA1, ΔChiA2, ΔVC0769,<br>ΔVC1073, ΔVCA0140, ΔGbpA,<br>ΔVC1807::Kan <sup>R</sup> , pMMB-VC1073<br>Carb <sup>R</sup>   | Δ6 (VCA0700 only) mutant with<br>with pMMB67EH containing<br>VC1073 – cloned into the EcoRI<br>and BamHI sites of the MCS.  | This Study<br>(CAH429 /<br>SAD1377) |
| Δ6 (VCA0700 only)<br>pMMB-VCA0140 | ΔChiA1, ΔChiA2, ΔVC0769,<br>ΔVC1073, ΔVCA0140, ΔGbpA,<br>ΔVC1807::Kan <sup>R</sup> , pMMB-<br>VCA0140 Carb <sup>R</sup> | Δ6 (VCA0700 only) mutant with<br>with pMMB67EH containing<br>VCA0140 – cloned into the EcoRI<br>and BamHI sites of the MCS. | This Study<br>(CAH430 /<br>SAD1378) |
| Δ6 (VCA0700 only)<br>pMMB-GbpA    | ΔChiA1, ΔChiA2, ΔVC0769,<br>ΔVC1073, ΔVCA0140, ΔGbpA,<br>ΔVC1807::Kan <sup>R</sup> , pMMB-GbpA<br>Carb <sup>R</sup>     | Δ6 (VCA0700 only) mutant with<br>with pMMB67EH containing GbpA<br>– cloned into the EcoRI and<br>BamHI sites of the MCS.    | This Study<br>(CAH428 /<br>SAD1379) |
| ΔVC0995                           | ΔVC0995, ΔVC1807::Spec <sup>R</sup>                                                                                     | Deleted 500bp of the 5' end of<br>VC0995                                                                                    | This Study<br>(SAD265)              |
| ΔVC1282                           | ΔVC1282, ΔVC1807::Spec <sup>R</sup>                                                                                     | Deleted 500bp of the 5' end of<br>VC0995                                                                                    | This Study<br>(SAD269)              |
| ΔVC0618-19                        | ΔVC0618-VC0619                                                                                                          | In-frame deletion of VC0618-19                                                                                              | This Study<br>(SAD387)              |
| ΔVC0995 ΔVC0618-<br>19            | ΔVC0995, ΔVC0618-19,<br>ΔVC1807::Kan <sup>R</sup>                                                                       | Deleted 500bp of the 5' end of<br>VC0995 and in-frame deletion of<br>VC0618-19                                              | This Study<br>(CAH545 /<br>SAD1380) |
| ΔVC0995 ΔVC1282                   | ΔVC0995 ΔVC1282,<br>ΔVC1807::Kan <sup>R</sup>                                                                           | Deleted 500bp of the 5' end of<br>VC0995 and VC1282                                                                         | This Study<br>(CAH542 /<br>SAD1381) |
| ΔVC1282 ΔVC0618-<br>19            | ΔVC1282, ΔVC0618-19,<br>ΔVC1807::Kan <sup>R</sup>                                                                       | Deleted 500bp of the 5' end of<br>VC1282 and in-frame deletion of<br>VC0618-19                                              | This Study<br>(CAH543 /<br>SAD1382) |
| ΔVC0995 ΔVC1282<br>ΔVC0618-19     | ΔVC0995, ΔVC1282, ΔVC0618-<br>19, ΔVC1807::Kan <sup>R</sup>                                                             | Deleted 500bp of the 5' end of<br>VC0995 and VC1282. As well as<br>an in-frame deletion of VC0618-<br>19                    | This Study<br>(CAH544 /<br>SAD1383) |
| ΔVC0972                           | ΔVC0972::Spec <sup>R</sup>                                                                                              | Deleted VC0972 and replaced it<br>with a spec <sup>R</sup> cassette                                                         | This Study<br>(SAD115)              |
| Δ7 pMMB-ChiA1-<br>FLAG            | ΔChiA1, ΔChiA2, ΔVC0769,<br>ΔVCA0700, ΔVC1073,                                                                          | Added a C-terminal FLAG tag onto<br>the pMMB construct indicated.                                                           | This Study<br>(CAH714 /             |

|                                  |                                                                                                                                                                                                               |                                                                   |                                     |
|----------------------------------|---------------------------------------------------------------------------------------------------------------------------------------------------------------------------------------------------------------|-------------------------------------------------------------------|-------------------------------------|
|                                  | $\Delta$ VCA0140, $\Delta$ GbpA,<br>$\Delta$ VCA1807::Spec <sup>R</sup> , pMMB-ChiA1-<br>FLAG Carb <sup>R</sup>                                                                                               |                                                                   | SAD1538)                            |
| $\Delta$ 7 pMMB-ChiA2-<br>FLAG   | $\Delta$ ChiA1, $\Delta$ ChiA2, $\Delta$ VCA0769,<br>$\Delta$ VCA0700, $\Delta$ VCA1073,<br>$\Delta$ VCA0140, $\Delta$ GbpA,<br>$\Delta$ VCA1807::Spec <sup>R</sup> , pMMB-ChiA2-<br>FLAG Carb <sup>R</sup>   | Added a C-terminal FLAG tag onto<br>the pMMB construct indicated. | This Study<br>(CAH715 /<br>SAD1539) |
| $\Delta$ 7 pMMB-VCA0769-<br>FLAG | $\Delta$ ChiA1, $\Delta$ ChiA2, $\Delta$ VCA0769,<br>$\Delta$ VCA0700, $\Delta$ VCA1073,<br>$\Delta$ VCA0140, $\Delta$ GbpA,<br>$\Delta$ VCA1807::Spec <sup>R</sup> , pMMB-<br>VCA0769-FLAG Carb <sup>R</sup> | Added a C-terminal FLAG tag onto<br>the pMMB construct indicated. | This Study<br>(CAH758 /<br>SAD1540) |
| $\Delta$ 7 pMMB-VCA0700-<br>FLAG | $\Delta$ ChiA1, $\Delta$ ChiA2, $\Delta$ VCA0769,<br>$\Delta$ VCA0700, $\Delta$ VCA1073,<br>$\Delta$ VCA0140, $\Delta$ GbpA,<br>$\Delta$ VCA1807::Spec <sup>R</sup> , pMMB-<br>VCA0700-FLAG Carb <sup>R</sup> | Added a C-terminal FLAG tag onto<br>the pMMB construct indicated. | This Study<br>(CAH770 /<br>SAD1541) |
| $\Delta$ 7 pMMB-VCA1073-<br>FLAG | $\Delta$ ChiA1, $\Delta$ ChiA2, $\Delta$ VCA0769,<br>$\Delta$ VCA0700, $\Delta$ VCA1073,<br>$\Delta$ VCA0140, $\Delta$ GbpA,<br>$\Delta$ VCA1807::Spec <sup>R</sup> , pMMB-<br>VCA1073-FLAG Carb <sup>R</sup> | Added a C-terminal FLAG tag onto<br>the pMMB construct indicated. | This Study<br>(CAH769 /<br>SAD1542) |
| $\Delta$ 7 pMMB-VCA0140-<br>FLAG | $\Delta$ ChiA1, $\Delta$ ChiA2, $\Delta$ VCA0769,<br>$\Delta$ VCA0700, $\Delta$ VCA1073,<br>$\Delta$ VCA0140, $\Delta$ GbpA,<br>$\Delta$ VCA1807::Spec <sup>R</sup> , pMMB-<br>VCA0140-FLAG Carb <sup>R</sup> | Added a C-terminal FLAG tag onto<br>the pMMB construct indicated. | This Study<br>(CAH762 /<br>SAD1543) |
| $\Delta$ 7 pMMB-GbpA-<br>FLAG    | $\Delta$ ChiA1, $\Delta$ ChiA2, $\Delta$ VCA0769,<br>$\Delta$ VCA0700, $\Delta$ VCA1073,<br>$\Delta$ VCA0140, $\Delta$ GbpA,<br>$\Delta$ VCA1807::Spec <sup>R</sup> , pMMB-GbpA-<br>FLAG Carb <sup>R</sup>    | Added a C-terminal FLAG tag onto<br>the pMMB construct indicated. | This Study<br>(CAH761 /<br>SAD1544) |

**Table S2 - Primers used in this study**

| Primer Name                     | Primer Sequence (5'→3')                           | Description       |
|---------------------------------|---------------------------------------------------|-------------------|
| <b>Primers for SOE products</b> |                                                   |                   |
| BBC509                          | ACTACAATGTATTGATGAAGTGG                           | ΔChiA1 F1         |
| BBC510                          | GCTAATTCAGTTTAAGCGGCCATGTTTCTCTCTCTGTATTAGATG     | ΔChiA1 R1         |
| BBC511                          | ATGGCCGCTTAAACTGAATTAGCCAGCGTAACGCCTACTGGTAAC     | ΔChiA1 F2         |
| BBC512                          | TTTTGTAGTCTTGTGCTTGCGAG                           | ΔChiA1 R2         |
| BBC514                          | AAAAGCATCGCTGGAAGAGTG                             | ΔChiA2 F1         |
| BBC515                          | GCTAATTCAGTTTAAGCGGCCATAAGTTTTCTCTCTCTTCCTTAG     | ΔChiA2 R1         |
| BBC516                          | ATGGCCGCTTAAACTGAATTAGCGAGTATTTATGATCGTAAGTTTACGG | ΔChiA2 F2         |
| BBC517                          | TCACCGAAATTGCACCAATCAAC                           | ΔChiA2 R2         |
| BBC519                          | CCAGAACAAACCATTGCTGATG                            | ΔVC0769 F1        |
| BBC520                          | GCTAATTCAGTTTAAGCGGCCATGGATAAAAAGTCCCTCTCTC       | ΔVC0769 R1        |
| BBC521                          | ATGGCCGCTTAAACTGAATTAGCAGAGTGGCAACAAGCGCTG        | ΔVC0769 F2        |
| BBC522                          | TTGCATGGTTTCGCAAGCTTAAG                           | ΔVC0769 R2        |
| BBC524                          | AAGTGCAGTTGGATCACTGACAC                           | ΔgbpA F1          |
| BBC525                          | GCTAATTCAGTTTAAGCGGCCATCACAGACTCTTCTTTGTTAGC      | ΔgbpA R1          |
| BBC526                          | ATGGCCGCTTAAACTGAATTAGCCCACGAATGTATCGTGCCTG       | ΔgbpA F2          |
| BBC527                          | CTCATGCATCGTATGTGAAAGC                            | ΔgbpA R2          |
| BBC529                          | CAGTTAATTGCTCAAAACCAGC                            | ΔVCA0700 F1       |
| BBC530                          | GCTAATTCAGTTTAAGCGGCCATTGTTGTTCTTCCCTCAAG         | ΔVCA0700 R1       |
| BBC531                          | ATGGCCGCTTAAACTGAATTAGCTAAAGGGGCTGTCAGCAC         | ΔVCA0700 F2       |
| BBC532                          | AACGCTTTCATATCTCAGAGCG                            | ΔVCA0700 R2       |
| BBC534                          | TTTCAGCGCCTGTCAAAGAAG                             | ΔVC1073 F1        |
| BBC535                          | GCTAATTCAGTTTAAGCGGCCATTATTTGAGACTTATTTTATTGAAC   | ΔVC1073 R1        |
| BBC536                          | ATGGCCGCTTAAACTGAATTAGCGTTCATTGAAGGCCAGACCG       | ΔVC1073 F2        |
| BBC537                          | CAGTGCCTGTTTGGTATGG                               | ΔVC1073 R2        |
| BBC539                          | AATATCAAACCCTTCCGTGACAC                           | ΔVCA0140 F1       |
| BBC540                          | GCTAATTCAGTTTAAGCGGCCATTTCTGTTTACAAATGGCTAAC      | ΔVCA0140 R1       |
| BBC541                          | ATGGCCGCTTAAACTGAATTAGCACTGACGTGGGATGACTTGGAA     | ΔVCA0140 F2       |
| BBC542                          | AATTTGTGCGAGCTTGGAAGGAG                           | ΔVCA0140 R2       |
| BBC401                          | ACCAGCAAAGCTAATAAAATCGAG                          | ΔpilA (VC2423) F1 |
| BBC402                          | gtcgacggatccccggaatGAGCATATGCCTTGCTACACAAG        | ΔpilA (VC2423) R1 |
| BBC403                          | gaagcagctccagcctacaACTGCAGGTGCAACAATTAATAA        | ΔpilA (VC2423) F2 |
| BBC404                          | CGCCATACTAACCAATACACTC                            | ΔpilA (VC2423) R2 |
| ABD927                          | GCAGAGAAAGGGTATCATTACTGG                          | ΔVC0995 F1        |
| ABD928                          | GcTAATTCAGTTTAAGCGGCCATCTTAAGTTCCCCCTATAG         | ΔVC0995 R1        |

|                                                                                  |                                                                 |                                                                                 |
|----------------------------------------------------------------------------------|-----------------------------------------------------------------|---------------------------------------------------------------------------------|
|                                                                                  | GATTTTTG                                                        |                                                                                 |
| ABD929                                                                           | ATGGCCGCTTAACTGAATTAgCACATCAGGTGCTTTAGGC<br>CAATTTG             | ΔVC0995 F2                                                                      |
| ABD930                                                                           | TACTCTCGTTTTTCGGCTTACTC                                         | ΔVC0995 R2                                                                      |
| ABD943                                                                           | ATATTCTTGCGGTATTAGCCACAC                                        | ΔVC1282 F1                                                                      |
| ABD944                                                                           | GCTAATTCAGTTTAAAGCGGCCATCTTATATTTAAGATAAA<br>GAGTTCCTA          | ΔVC1282 R1                                                                      |
| ABD945                                                                           | ATGGCCGCTTAACTGAATTAGCATTACCATTTCGTATGCCA<br>GAGC               | ΔVC1282 F2                                                                      |
| ABD946                                                                           | GCAGATGTTTCATTAAAGGGTCG                                         | ΔVC1282 R2                                                                      |
| BBC081                                                                           | AAGCAAGTTCACGTTTGCCG                                            | ΔVC0618-19 F1                                                                   |
| BBC082                                                                           | gtcgacggatccccggaatCATAACTTACACCTTACTCACCCAG                    | ΔVC0618-19 R1                                                                   |
| BBC083                                                                           | gaagcagctccagcctacaGGAGATAAATAATCATGACTACGCC                    | ΔVC0618-19 F2                                                                   |
| BBC084                                                                           | TAAAGTTCGCAACACGCC                                              | ΔVC0618-19 R2                                                                   |
| ABD800                                                                           | TTTGTGCGGTGGTGTTACGGTAAG                                        | ΔVC0972 F1                                                                      |
| ABD801                                                                           | gtcgacggatccccggaatCATGGATAACTCCTAAAAATGGATAT<br>AGCTG          | ΔVC0972 R1                                                                      |
| ABD802                                                                           | gaagcagctccagcctacaGTACGTGTAGGTCTGGAATACGG                      | ΔVC0972 F2                                                                      |
| ABD803                                                                           | AAAGCAAGATACAGAACGCGACC                                         | ΔVC0972 R2                                                                      |
| <b>Primers to clone genes into pMMB67EH</b>                                      |                                                                 |                                                                                 |
| CAH0030                                                                          | gataacaattcacacaggaacagaattcAggaggtAGAAACATGAAG<br>CGCTATTG     | ChiA1 F                                                                         |
| CAH0031                                                                          | gactctagaggatccccgggtaccgagctcTACTGAGCATTATTCAT<br>CTGGC        | ChiA1 R                                                                         |
| CAH0032                                                                          | ataacaatttcacacaggaacagaattcAggaggtAACTTATGAATC<br>GAATGACTTTG  | ChiA2 F                                                                         |
| CAH0033                                                                          | gactctagaggatccccgggtaccgagctcTTAATGAGTAGAACAAC<br>CGCGGC       | ChiA2 R                                                                         |
| CAH0026                                                                          | aacaatttcacacaggaacagaattcAggaggtTTATCCATGTTTAA<br>ACTCAAACATAC | VC0769 F                                                                        |
| CAH0027                                                                          | gactctagaggatccccgggtaccgagctcTTAGCAGGACACCTTATC<br>CCAG        | VC0769 R                                                                        |
| CAH0036                                                                          | gataacaatttcacacaggaacagaattcAggaggtACAACAATGCGT<br>GACTCG      | VCA0700 F                                                                       |
| CAH0037                                                                          | gactctagaggatccccgggtaccgagctcTTACGCCTGAGGGCAAGT<br>C           | VCA0700 R                                                                       |
| CAH0028                                                                          | aacaatttcacacaggaacagaattcAggaggtGAAATAATGAAAAG<br>ATCAGCATTAAC | VC1073 F                                                                        |
| CAH0029                                                                          | gactctagaggatccccgggtaccgagctcTTAGATTTTGCACACCGC<br>TTTCC       | VC1073 R                                                                        |
| CAH0034                                                                          | acaatttcacacaggaacagaattcAggaggtATAACCATGAAATAC<br>GGATTAAAAATC | VCA0140 F                                                                       |
| CAH0035                                                                          | gactctagaggatccccgggtaccgagctcTTAGCGCCACACACCCC                 | VCA0140 R                                                                       |
| CAH0038                                                                          | acaatttcacacaggaacagaattcAggaggtTCTGTGATGAAAAAA<br>CAACCTAAAATG | gbpA F                                                                          |
| CAH0039                                                                          | gactctagaggatccccgggtaccgagctcTTAACGTTTATCCCACGC<br>CATTTCC     | gbpA R                                                                          |
| BBC277                                                                           | TATAGAATTCATGGATATGAATGAGCAACAG                                 | tfoX F                                                                          |
| BBC278                                                                           | TATAGGATCCTTAACGCTGCTGACAACCTTTC                                | tfoX R                                                                          |
| <b>Primers to add C-terminal FLAG tag onto pMMB chitinase expression vectors</b> |                                                                 |                                                                                 |
| BBC1531                                                                          | gattataaggatgacgatgacaaaTAAGAGCTCGGTACCCGG                      | Universal F primer for adding a C-terminal FLAG tag onto pMMB cloned chitinases |

|                      |                                                          |                                           |
|----------------------|----------------------------------------------------------|-------------------------------------------|
| BBC1534              | CTCTTAtttgtcatcgatccttataatcCTGAGCATTATTCATCTG<br>GCTAAG | ChiA1 specific R                          |
| BBC1535              | CTCTTAtttgtcatcgatccttataatcATGAGTAGAACAACCTCGC<br>GGC   | ChiA2 specific R                          |
| BBC1662              | CTCTTAtttgtcatcgatccttataatcGCAGGACACCTTATCCCA<br>GAAC   | VC0769 specific R                         |
| BBC1664              | CTCTTAtttgtcatcgatccttataatcGATTTTGCACACCGCTTTC<br>CATG  | VC1073 specific R                         |
| BBC1666              | CTCTTAtttgtcatcgatccttataatcCGCCTGAGGGCAAGTCAC<br>TTC    | VCA0700 specific R                        |
| BBC1670              | CTCTTAtttgtcatcgatccttataatcGCGCCACACACCCCATTCG          | VCA0140 specific R                        |
| BBC1668              | CTCTTAtttgtcatcgatccttataatcACGTTTATCCCACGCCATT<br>TCC   | GbpA specific R                           |
| Primers for MASC-PCR |                                                          |                                           |
| ABD969               | ATGGCCGCTTAACTGAATTAGC                                   | F primer for all MASC-PCR reactions       |
| BBC513               | ATAAGGCTCAGAGCTATCGATC                                   | R primer for $\Delta$ ChiA1 detect ~190bp |
| BBC518               | CAGGAAACGTTTCACAGAAGC                                    | R primer for $\Delta$ chiA2 detect ~400bp |
| BBC523               | TTTTGGTGCTTGTGGCGTG                                      | R primer for VC0769 detect ~301bp         |
| BBC528               | CGCCAATCTCATACTCTTTCGC                                   | R primer for gbpA detect ~500bp           |
| BBC533               | CTACCCCTGGCCACTCTTTACC                                   | R primer for VCA0700 detect ~650bp        |
| BBC538               | TTTCCCACGTCATCTTGGTC                                     | R primer for VC1073 detect ~800bp         |
| BBC543               | CCAGAACTCTTAACCACCATG                                    | R primer for VCA0140 detect<br>~1000bp    |
